# Supplementary material for: Inter-Population Genetic Diversity and Clustering of Merozoite Surface Protein-1 (pkmsp-1) of Plasmodium knowlesi Isolates from Malaysia and Thailand
Source: MDPI journal article supplement (doi:10.3390/tropicalmed8050285), 2023-05-20
Supplement: s1 [file s1]

### Supplemental Table S1

**Table S1.** Details of peninsular Malaysia specimens included in the study.

| No. | Specimen number | Origin          | Accession number |
|-----|-----------------|-----------------|------------------|
| 1   | KEL30012        | Kelantan        | ON926538         |
| 2   | JHR30004        | Johor           | ON926539         |
| 3   | NS30002         | Negeri Sembilan | ON926540         |
| 4   | NS30004         | Negeri Sembilan | ON926541         |
| 5   | SEL30001        | Selangor        | ON926542         |
| 6   | SEL30002        | Selangor        | ON926543         |
| 7   | SEL30003        | Selangor        | ON926544         |
| 8   | PRK30007        | Perak           | ON926545         |
| 9   | PRK30008        | Perak           | ON926546         |
| 10  | SEL30004        | Selangor        | ON926547         |
| 11  | SEL30009        | Selangor        | ON926548         |
| 12  | SEL30010        | Selangor        | ON926549         |
| 13  | SEL30011        | Selangor        | ON926550         |
| 14  | MEL30002        | Melaka          | ON926551         |
| 15  | JHR30001        | Johor           | ON926557         |
| 16  | PHG30006        | Pahang          | ON926558         |
| 17  | PHG30007        | Pahang          | ON926559         |
| 18  | SEL30005        | Selangor        | ON926560         |
| 19  | KEL30013        | Kelantan        | ON926561         |
| 20  | TRG30002        | Terengganu      | ON926562         |
